# Supplementary material for: Early circulating tumor DNA dynamics and clonal selection with palbociclib and fulvestrant for breast cancer
Source: PubMed Central journal article supplement (PMC5832789; doi:10.1038/s41467-018-03215-x), 2018-03-01
Supplement: 41467_2018_3215_MOESM1_ESM.pdf [file 41467_2018_3215_MOESM1_ESM.pdf]

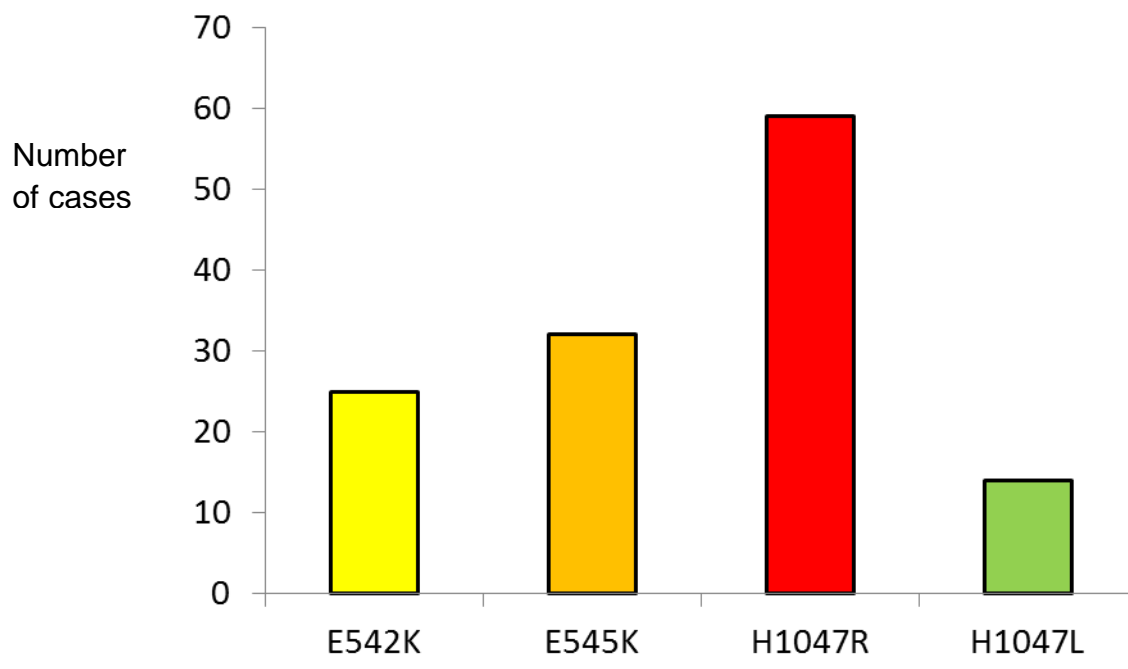

Supplementary figure 1. *PIK3CA* mutations identified in the baseline plasma samples of the PALOMA-3 trial with multiplex digital PCR and confirmed in singleplex.

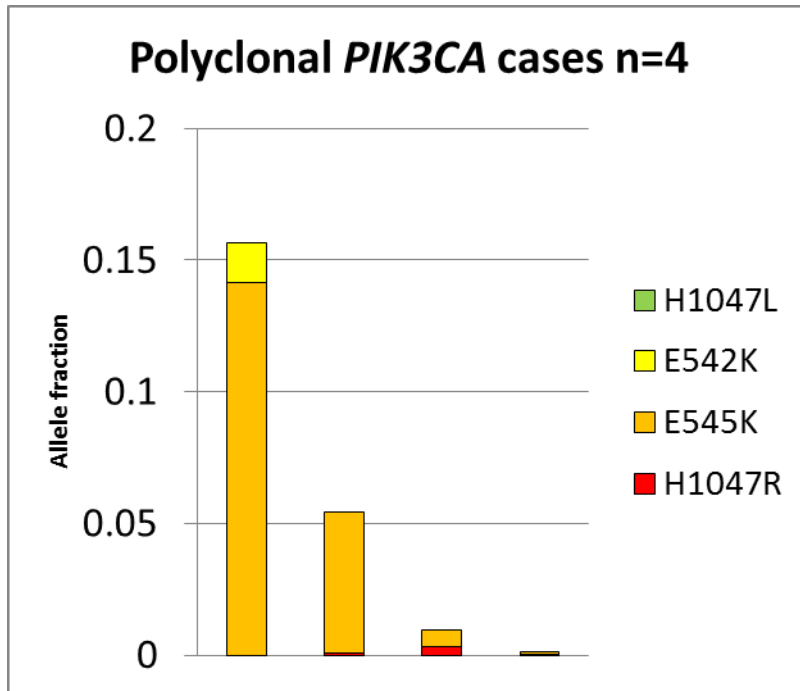

| Sample | E545K  | H1047R | E542K  |
|--------|--------|--------|--------|
| 52     | 0.0009 | 0.0005 | 0.0000 |
| 312    | 0.0077 | 0.0031 | 0.0000 |
| 34     | 0.1414 | 0.0000 | 0.0150 |
| 157    | 0.0538 | 0.0006 | 0.0000 |

Supplementary figure 2. Allele fraction details for polyclonal *PIK3CA* mutations observed in the PALOMA-3 set.

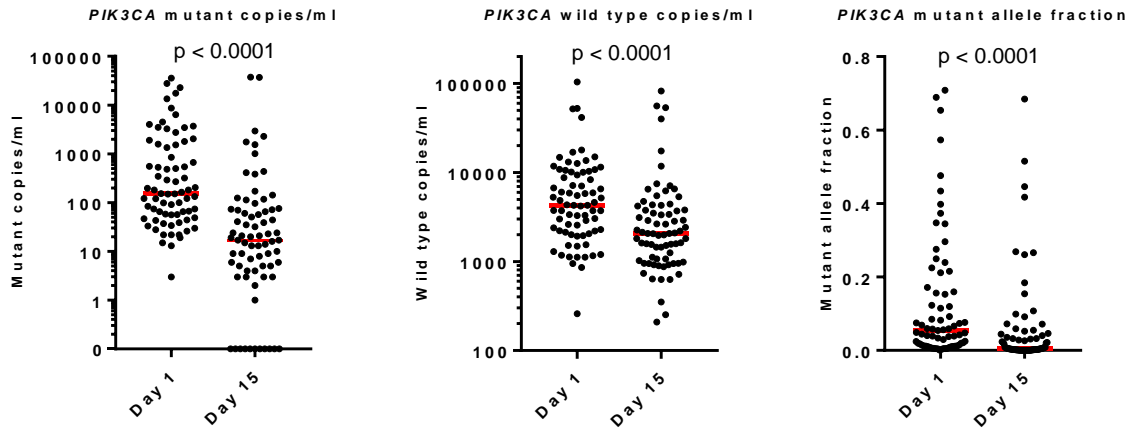

Supplementary figure 3. *PIK3CA* allele characteristics in the baseline plasma samples compared to day 15. P values Wilcoxon signed-rank test. Red line at median.

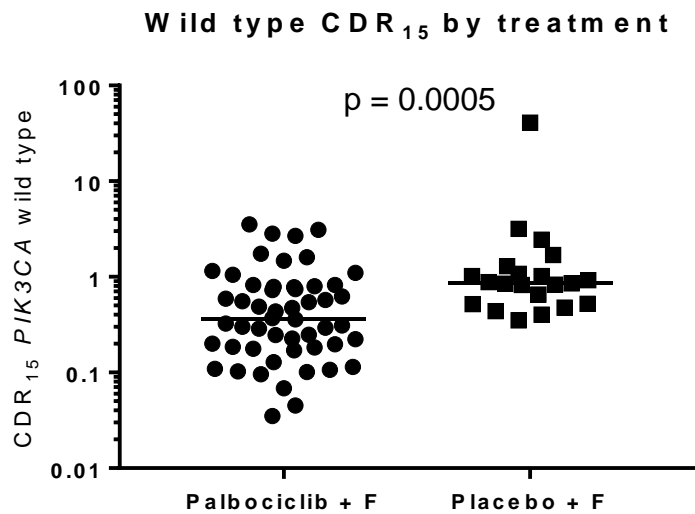

Supplementary figure 4. CDR<sub>15</sub> for the wild type *PIK3CA* allele in patients with *PIK3CA* mutations split by treatment. CDR<sub>15</sub> is defined as the ratio of mutant copies/ml at day 15 to the mutant copies/ml at day 1. F is fulvestrant. P value by Mann Whitney. Line at median. Correlation analyses of the absolute reduction of mutant and wild type copies/ml (*ESR1* Spearman's  $r = 0.57$ , 95%CI 0.38 – 0.72)  $p < 0.0001$  *PIK3CA* Spearman's  $r = 0.58$  (95%CI 0.40 – 0.72,  $p < 0.0001$ ) suggest at least in part this is due to a reduction in detection of wild type allele from the tumour.

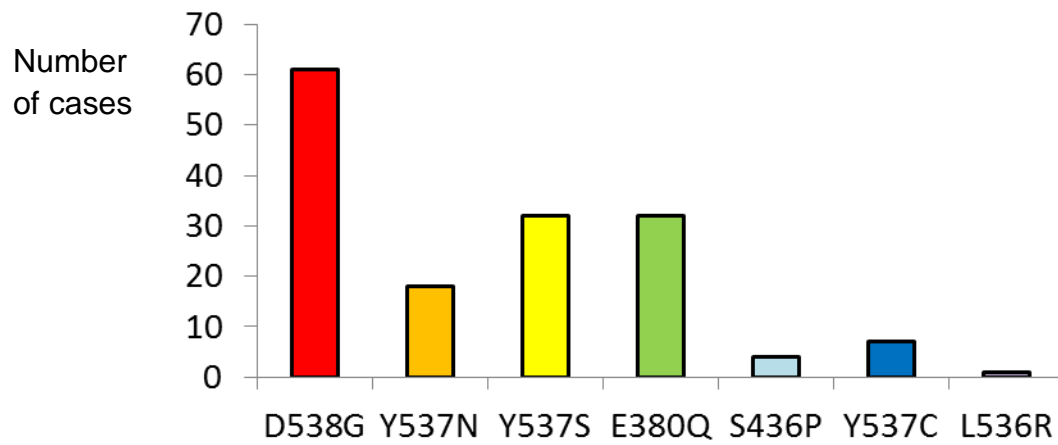

Supplementary figure 5. *ESR1* mutations identified in the baseline plasma samples of the PALOMA-3 trial with multiplex digital PCR and confirmed in singleplex.

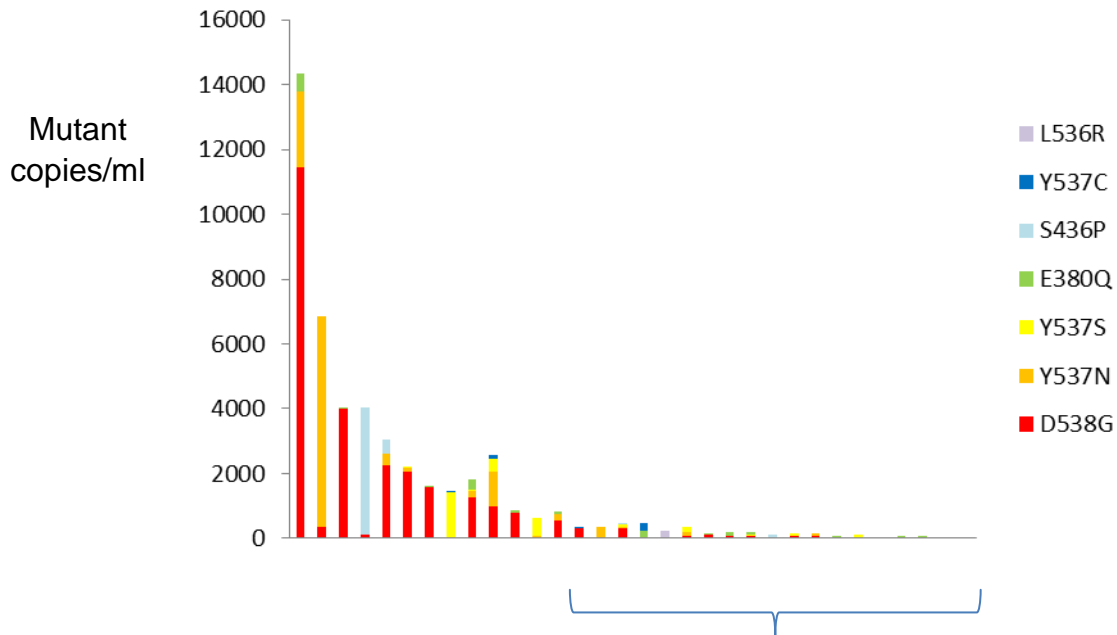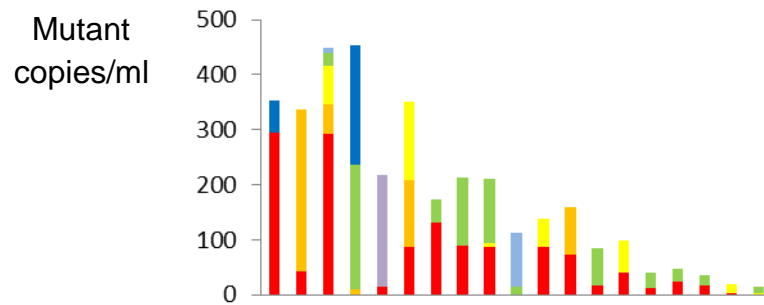

Supplementary figure 6. Clonal composition of polyclonal *ESR1* mutant samples at baseline by digital PCR. Each bar represents a single patient identified as having more than one *ESR1* mutation. The mutations are color-coded to demonstrate their proportion of contribution to the total mutant copies/ml. The lower panel is an enlarged section of the upper panel, to enable clearer visualisation of the lower abundance sub clones.

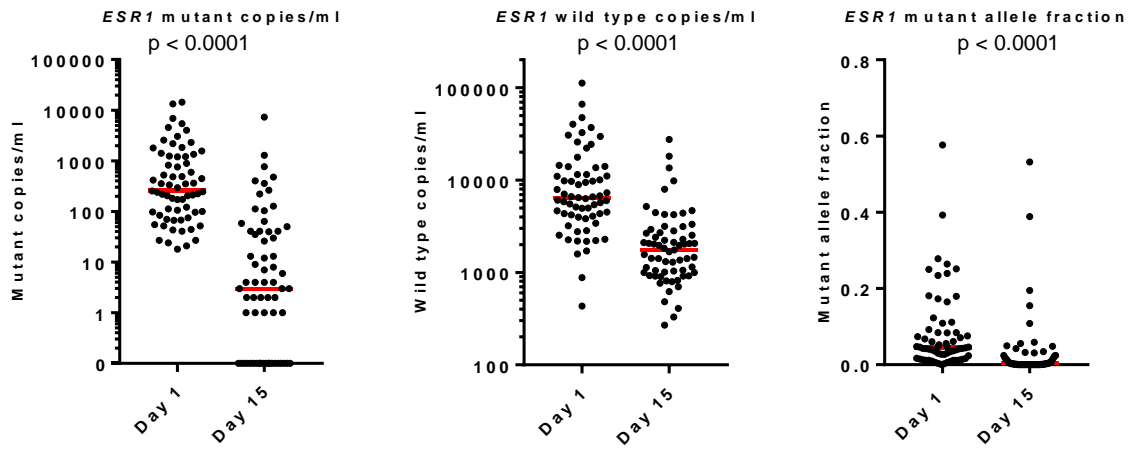

Supplementary figure 7. *ESR1* allele characteristics in the baseline plasma samples compared to day 15. P values Wilcoxon signed-rank test. Lines at median.

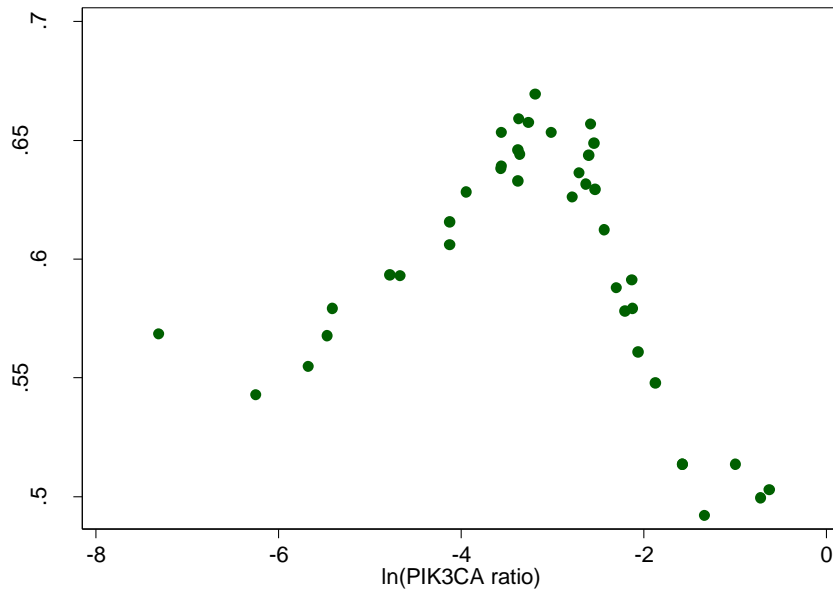

| Cut-point | ln(Cut-point) | N ≤ cut-point | N > cut-point | HR (high cf. low) | Lower 95% CI | Upper 95% CI | Logrank p-value | Harrell's C | q-value* |
|-----------|---------------|---------------|---------------|-------------------|--------------|--------------|-----------------|-------------|----------|
| 0.0757347 | -2.580519     | 36            | 16            | 4.75              | 2.03         | 11.12        | 0.0000893       | 0.657       | 0.0037   |
| 0.041325  | -3.186287     | 30            | 22            | 4.92              | 1.98         | 12.26        | 0.0001756       | 0.669       | 0.007    |
| 0.0783447 | -2.546637     | 37            | 15            | 4.4               | 1.89         | 10.2         | 0.000185        | 0.649       | 0.0072   |
| 0.0382593 | -3.263368     | 29            | 23            | 4.25              | 1.8          | 10.07        | 0.0003809       | 0.657       | 0.0145   |
| 0.0345713 | -3.364732     | 27            | 25            | 4.42              | 1.8          | 10.81        | 0.0004329       | 0.659       | 0.016    |
| 0.0741846 | -2.601199     | 35            | 17            | 3.96              | 1.71         | 9.19         | 0.0005667       | 0.644       | 0.0204   |
| 0.0491763 | -3.012343     | 31            | 21            | 4.18              | 1.73         | 10.06        | 0.000584        | 0.653       | 0.0204   |
| 0.0794812 | -2.532235     | 38            | 14            | 3.82              | 1.65         | 8.82         | 0.000793        | 0.629       | 0.027    |
| 0.028587  | -3.554804     | 24            | 28            | 4.3               | 1.68         | 11.03        | 0.0010564       | 0.653       | 0.0349   |
| 0.066741  | -2.706935     | 33            | 19            | 3.77              | 1.61         | 8.86         | 0.0011213       | 0.636       | 0.0359   |

Supplementary figure 8. Optimizing circulating DNA response cut point by Harrell's c-index.

Ln(PIK3CA ratio) is the natural logarithm of the CDR<sub>15</sub> for PIK3CA mutation where the CDR<sub>15</sub> is defined as the ratio of mutant copies/ml at day 15 and day 1.

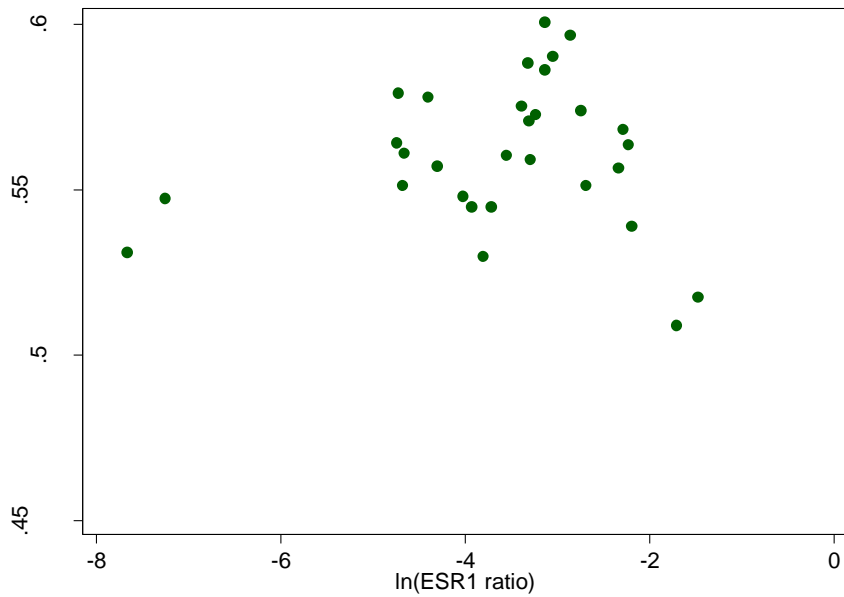

| Cut-point | ln(Cut-point) | N ≤ cut-point | N > cut-point | HR (high cf. low) | Lower 95% CI | Upper 95% CI | Logrank p-value | Harrell's C | q-value* |
|-----------|---------------|---------------|---------------|-------------------|--------------|--------------|-----------------|-------------|----------|
| 0.043496  | -3.13508      | 36            | 11            | 3.3               | 1.36         | 8.01         | 0.004989        | 0.601       | 0.1497   |
| 0.057136  | -2.86232      | 38            | 9             | 3.65              | 1.35         | 9.85         | 0.006087        | 0.597       | 0.1765   |
| 0.047312  | -3.05099      | 37            | 10            | 3.08              | 1.24         | 7.67         | 0.010586        | 0.59        | 0.2858   |
| 0.036092  | -3.32169      | 31            | 16            | 2.33              | 1            | 5.41         | 0.042326        | 0.588       | 0.9156   |
| 0.043318  | -3.13919      | 35            | 12            | 2.59              | 1.08         | 6.22         | 0.02603         | 0.586       | 0.6768   |
| 0.008871  | -4.72496      | 20            | 27            | 1.77              | 0.79         | 3.97         | 0.157281        | 0.579       | 0.9156   |
| 0.012293  | -4.39871      | 23            | 24            | 1.95              | 0.85         | 4.48         | 0.108305        | 0.578       | 0.9156   |
| 0.033794  | -3.38748      | 30            | 17            | 2.04              | 0.88         | 4.75         | 0.088481        | 0.575       | 0.9156   |
| 0.064382  | -2.74293      | 39            | 8             | 3                 | 1.06         | 8.49         | 0.028348        | 0.574       | 0.7087   |
| 0.039353  | -3.23519      | 34            | 13            | 2.16              | 0.9          | 5.16         | 0.074636        | 0.573       | 0.9156   |

Supplementary figure 9. Optimizing circulating DNA response cut point by Harrell's c-index for *ESR1* mutations.  $\ln(\text{ESR1 ratio})$  is the natural logarithm of the  $\text{CDR}_{15}$  for *ESR1* mutation where the  $\text{CDR}_{15}$  is defined as the ratio of mutant copies/ml at day 15 and day 1.



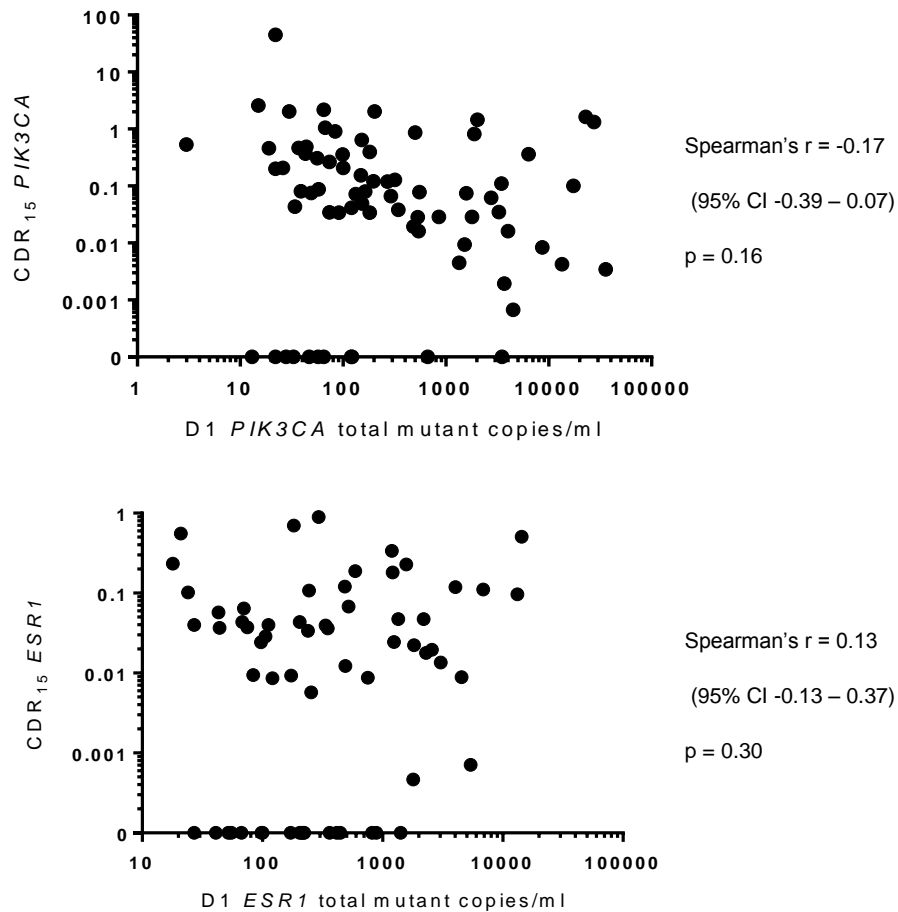

Supplementary figure 10. (Upper panel) Plot of *PIK3CA* day 1 mutant copies/ml versus *PIK3CA* CDR<sub>15</sub>, Spearman's r, 2-sided p value (Lower panel) Plot of *ESR1* day 1 mutant copies/ml versus *ESR1* CDR<sub>15</sub>, Spearman's r, 2-sided p value. HR – hazard ratio. CI – confidence interval.

| Univariate analysis                                | Hazard ratio | Lower 95% CI | Upper 95% CI | p value         |
|----------------------------------------------------|--------------|--------------|--------------|-----------------|
| Prior hormonal therapy (Yes/No)                    | 0.778        | 0.288        | 2.1          | 0.62            |
| Baseline copies/ml mutant <i>PIK3CA</i>            | 1.22         | 0.606        | 2.43         | 0.582           |
| Site of metastatic disease (Visceral/Non-visceral) | 1.69         | 0.763        | 3.73         | 0.191           |
| Menopausal status (Pre/peri v Post)                | 0.572        | 0.225        | 1.46         | 0.236           |
| Number of prior therapies (1 v >1)                 | 3.83         | 0.9          | 16.3         | 0.0502          |
| Number of disease sites (1 v >1)                   | 2.68         | 1.11         | 6.48         | <b>0.0234</b>   |
| Disease site liver (Yes v No)                      | 3.39         | 1.5          | 7.64         | <b>0.00181</b>  |
| CDR15 (High v Low)                                 | 4.92         | 1.98         | 12.3         | <b>0.000178</b> |
| Multivariate analysis                              | Hazard ratio | Lower 95% CI | Upper 95% CI | p value         |
| Disease site liver (Yes v No)                      | 4.01         | 1.76         | 9.15         | <b>0.00095</b>  |
| CDR15 (High v Low)                                 | 5.73         | 2.26         | 14.51        | <b>0.00023</b>  |

Supplementary figure 11. Univariate and multivariate analyses of n=52 patients used to assess mutant *PIK3CA* CDR<sub>15</sub> in the patients receiving palbociclib and fulvestrant. The multivariate analysis was performed using the Cox proportional hazards model. The baseline clinical or pathological factors included in the analysis were disease site (Visceral vs. Non-Visceral), sensitivity to prior hormonal therapy (Yes vs. No), menopausal status at study entry (Pre/Peri vs. Post), number of prior

therapies (1 vs. 2 or more), number of disease sites (1 vs. 2 or more), disease site (liver vs. other), and baseline copies of *PIK3CA*. Univariate analyses were conducted as an initial procedure to only retain factors with  $p < 0.1$  in the multivariate analysis. For the multivariate analysis predictors with  $p < 0.1$  from the univariate analyses were retained (4 out of 7). Two of the predictors stayed in the final model (met the typical  $p < 0.05$  criteria) with the other two predictors dropped (with  $p$ -value greater than 0.05 when all 4 predictors were included in the multivariable analysis). The assumption for Cox regression met and there was not interaction between the two variables.

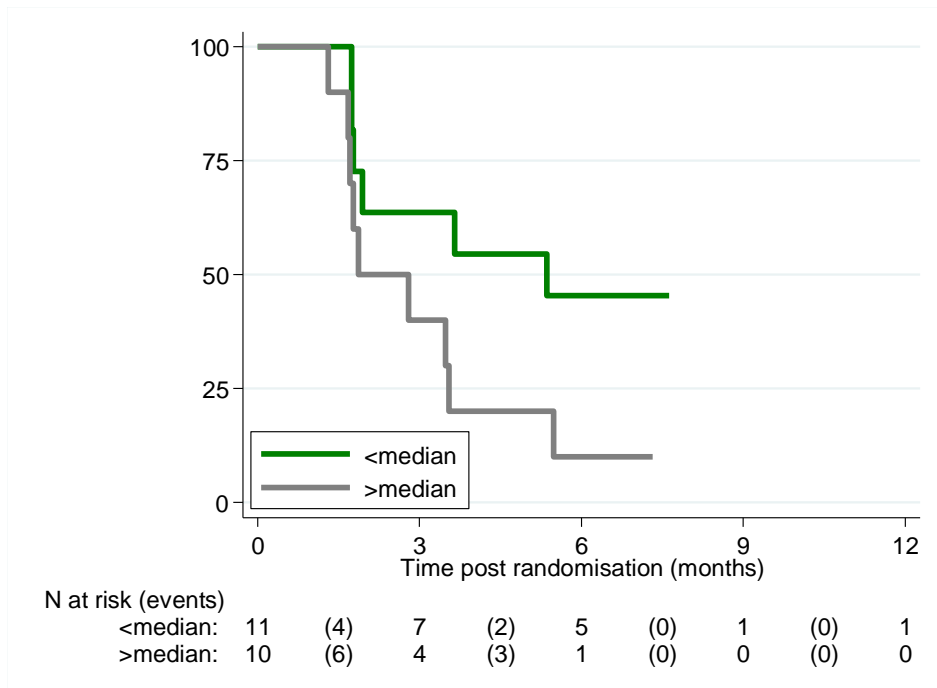

Supplementary figure 12. Kaplan Meier plot for PFS of patients randomized to placebo and fulvestrant split by median *PIK3CA* CDR<sub>15</sub>. Hazard ratio for >median compared with <median = 2.54 (95% CI 0.89 – 7.25). Logrank test p=0.07.

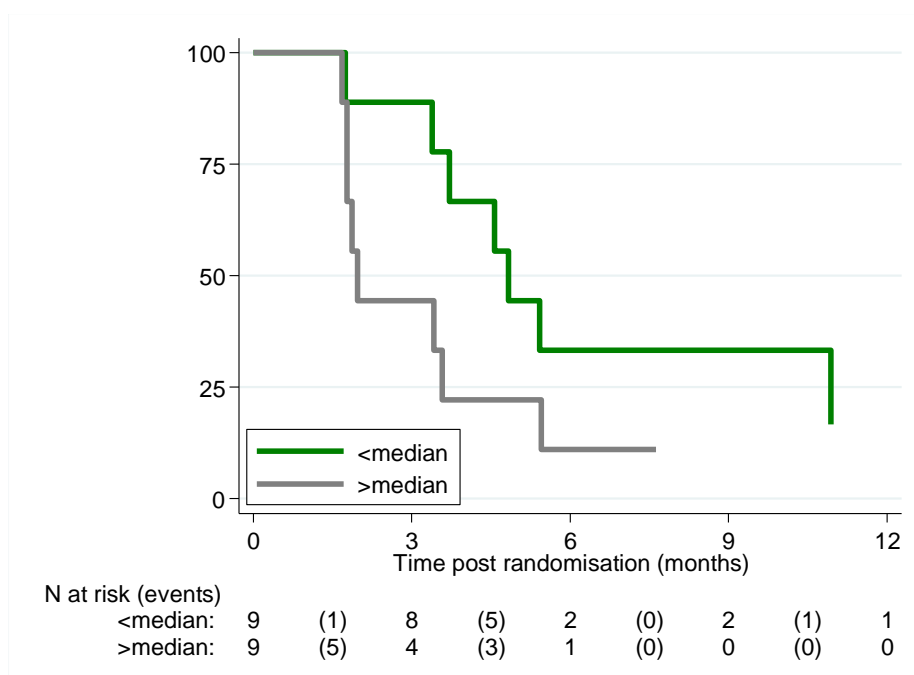

Supplementary figure 13. Kaplan Meier plot for PFS of patients randomized to placebo and fulvestrant split by median *ESR1* CDR<sub>15</sub>. Hazard ratio for >median compared with <median = 2.28 (95% CI 0.77 – 6.70). Logrank test p=0.12.

| Lab ID | D1 <i>PIK3CA</i> total mutant copies/ml | D15 <i>PIK3CA</i> total mutant copies/ml | D15/D1 <i>PIK3CA</i> total mutant copies/ml | D1 <i>ESR1</i> total mutant copies/ml | D15 <i>ESR1</i> total mutant copies/ml | D15/D1 <i>ESR1</i> total mutant copies/ml | Inferred <i>ESR1</i> mutant copies/ml | Below LOD |
|--------|-----------------------------------------|------------------------------------------|---------------------------------------------|---------------------------------------|----------------------------------------|-------------------------------------------|---------------------------------------|-----------|
| 253    | 3708                                    | 7                                        | 0.002                                       | 886                                   | 0                                      | 0                                         | 2                                     | TRUE      |
| 152    | 2751                                    | 171                                      | 0.062                                       | 415                                   | 0                                      | 0                                         | 26                                    | FALSE     |
| 132    | 1584                                    | 117                                      | 0.074                                       | 27                                    | 0                                      | 0                                         | 2                                     | TRUE      |
| 241    | 555                                     | 44                                       | 0.078                                       | 67                                    | 0                                      | 0                                         | 5                                     | FALSE     |
| 72     | 542                                     | 9                                        | 0.016                                       | 212                                   | 0                                      | 0                                         | 3                                     | TRUE      |
| 27     | 152                                     | 97                                       | 0.643                                       | 1414                                  | 0                                      | 0                                         | 909                                   | FALSE     |
| 323    | 121                                     | 5                                        | 0.041                                       | 52                                    | 0                                      | 0                                         | 2                                     | TRUE      |
| 85     | 58                                      | 5                                        | 0.088                                       | 55                                    | 0                                      | 0                                         | 5                                     | FALSE     |

Supplementary figure 14. Inferred *ESR1* mutant copies/ml in cases with both *PIK3CA* and *ESR1* mutations and discordant *PIK3CA/ESR1* CDR<sub>15</sub>. *ESR1* copies/ml inferred using linear extrapolation

from the *PIK3CA* CDR<sub>15</sub> data then compared with the theoretical limit of detection for the assay. The theoretical limit of detection for a singleplex digital PCR assay was calculated on the basis of one FAM positive droplet out of 20,000 using the equation: Concentration =  $-\ln(\text{Negative droplets}/\text{All droplets})/\text{Droplet volume} * 20,000$ . It was then scaled by the tested plasma equivalent volume for inferred mutant copies/ml. Droplet volume was taken as 0.89nl.

| Lab ID | Inferred <i>ESR1</i> mutant copies/ml | New LOD with extra volume analysed | D538G copies/ml | E380Q copies/ml | D15 <i>ESR1</i> total mutant copies/ml | D15/D1 <i>ESR1</i> total mutant copies/ml | Change in status |
|--------|---------------------------------------|------------------------------------|-----------------|-----------------|----------------------------------------|-------------------------------------------|------------------|
| 253    | 2                                     | 2                                  | 0               | 0               | 0                                      | 0                                         | FALSE            |
| 132    | 2                                     | 2                                  | N/A             | 0               | 0                                      | 0                                         | FALSE            |
| 72     | 3                                     | 2                                  | 5               | 0               | 5                                      | 0.024                                     | TRUE             |
| 323    | 2                                     | 2                                  | 0               | N/A             | 0                                      | 0                                         | FALSE            |

Supplementary figure 15. Results from testing further 0.25ml plasma equivalent for each *ESR1* mutation in the cases detailed in supplementary figure C with an inferred mutant/copies/ml below the theoretical limit of detection of the digital PCR assay.

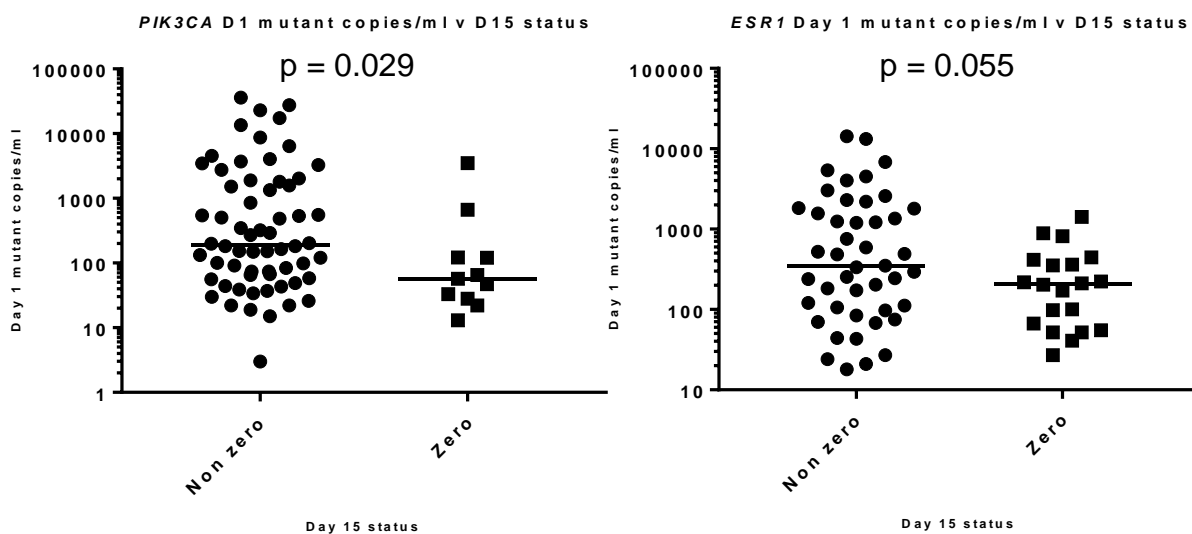

Supplementary figure 16. Comparison of baseline mutant copies/ml with detectable status at day 15 for *PIK3CA* and *ESR1*. P value calculated using Mann Whitney.

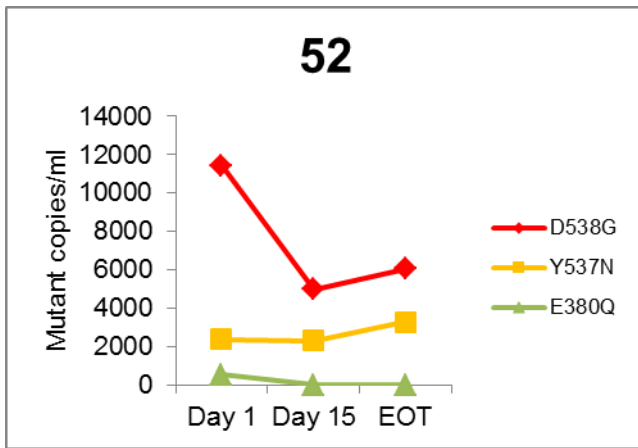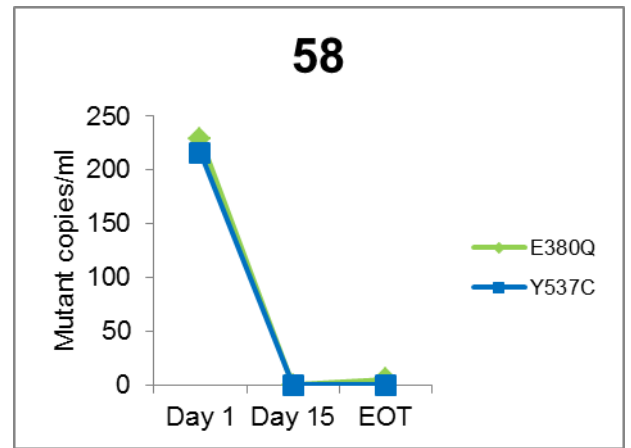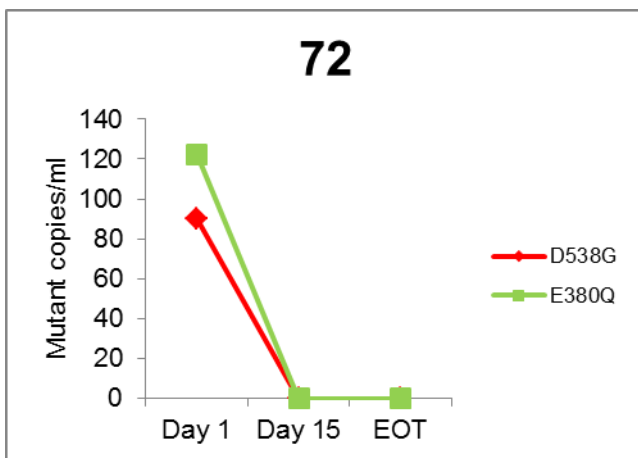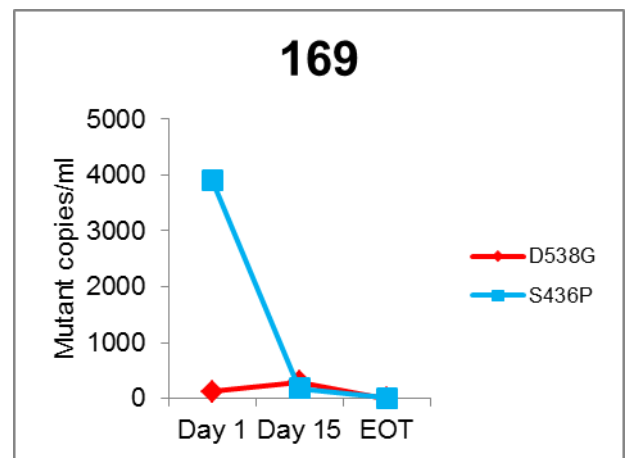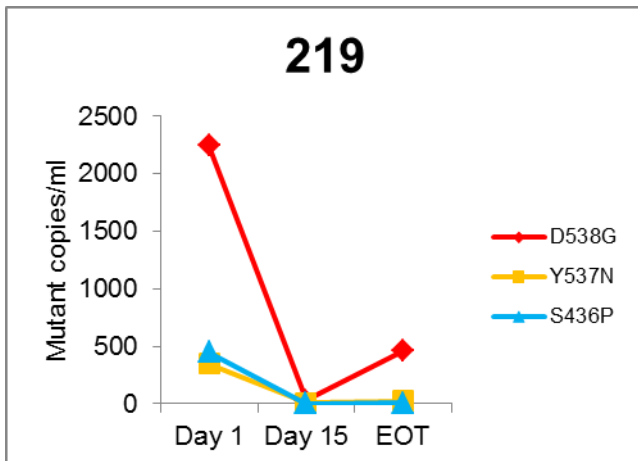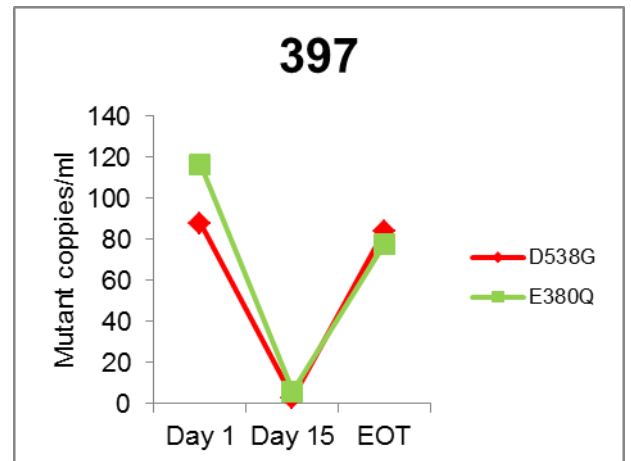

Supplementary figure 17. Clonal dynamics of polyclonal *ESR1* mutations. Data from 6 patients with polyclonal *ESR1* mutations identified at baseline then tracked through day 15 to end of treatment.

Vertical axis in each plot is mutant copies/ml

| Number of negative samples out of 25 in single simulation | 2 | 3   | 4    | 5    | 6    | 7    | 8   | 9   | 10 | 11 |
|-----------------------------------------------------------|---|-----|------|------|------|------|-----|-----|----|----|
| Number of times outcome observed after 10,000 repeats     | 0 | 474 | 1887 | 2944 | 2642 | 1450 | 484 | 109 | 10 | 0  |

Supplementary table 1. Simulated data to assess the likelihood of sampling error explaining the number of discordant *ESR1* undetectable tests in day 15 samples assessed for both *ESR1* and *PIK3CA* CDR<sub>15</sub> (Figure 4D). To model sampling error we defined the probability of having a positive result for each day15 sample by using the inferred copies/ml of *ESR1*, assuming equivalent CDR<sub>15</sub> to *PIK3CA* and independence of sampling events. This probability of *ESR1* being undetectable by sampling error was modelled using an individual Poisson distribution  $Po(\lambda)$  for each sample, where  $\lambda$  = inferred concentration and the probability of a negative result arising as a result of sampling error  $Po(X=0) = e^{-\lambda}$ . The observed rate of undetectable *ESR1* was 10/25 samples (40%, Figure 4D). In the simulation, repeated 10,000 times, the frequency of 10 or more negatives was 0.1% (10/10,000).
